# Supplementary material for: A trialkyl phosphine oxide functionalized task specific ionic liquid for actinide ion complexation: extraction and spectroscopic studies
Source: Royal Society of Chemistry journal article supplement (doi:10.1039/c5ra24174j), 2016-01-01
Supplement: c5ra24174j1.pdf [file c5ra24174j1.pdf]

# **A Trialkyl Phosphine Oxide Functionalized Task Specific Ionic Liquid for Actinide Ion Complexation: Extraction and Spectroscopic studies<sup>†</sup>**

**Minakshmi Paramanik, Dhaval R. Raut, Arijit Sengupta, Sunil K. Ghosh,  
Prasanta K. Mohapatra<sup>\*</sup>**

**Electronic Supplementary Information**

## Synthesis of PO-TSIL

A solution of lithium bis(trifluoromethanesulfonyl)imide salt (2.7 mmol, 780 mg) in dry acetonitrile (1.5 ml) was added to the solution of [TSIL]OMs (2.6 mmol, 1.2 g) [ref no.] in acetonitrile (1.5 ml) under argon atmosphere and allowed to stir it for 12h. The reaction mixture was under reduced pressure to remove excess acetonitrile and the residue was extracted with ethyl acetate and water. The organic extract was concentrated under reduced pressure to give [TSIL]NTf<sub>2</sub> (1.64 g, 98.5%).

IR (film): 3156, 3028, 2939, 2863, 1573, 1467, 1351, 1194, 1136, 1058, 767 cm<sup>-1</sup>;

<sup>1</sup>H NMR (500 MHz, CDCl<sub>3</sub>) : δ 9.13 (1 H, s, Im, NCHN), 7.51 (1H, s, Im), 7.26 (1 H, s, Im), 4.26 (2 H, t, <sup>3</sup>J<sub>HH</sub> = 7.0 Hz, NCH<sub>2</sub>), 3.94 (3 H, s, NCH<sub>3</sub>), 2.01-1.87 (8 H, m, 4 × CH<sub>2</sub>), 1.73-1.64 (2 H, m, CH<sub>2</sub>), 1.59-1.48 (6 H, m, 3 × CH<sub>2</sub>), 1.46-1.37 (4 H, m, 2 × CH<sub>2</sub>), 1.34-1.26 (8 H, m, 4 × CH<sub>2</sub>), 0.89 (6 H, t, <sup>3</sup>J<sub>HH</sub> = 6.5 Hz).

<sup>13</sup>C NMR (125 MHz, CDCl<sub>3</sub>) : δ 136.1, 123.5, 122.4, 119.7 (2 C, q, <sup>1</sup>J<sub>CF</sub> = 319 Hz), 49.6, 36.1, 31.1 (2 C), 30.5 (2 C, d, <sup>2</sup>J<sub>PC</sub> = 13.6 Hz), 29.3, 27.2 (2 C, d, <sup>1</sup>J<sub>PC</sub> = 65.0 Hz), 27.0 (1 C, d, <sup>2</sup>J<sub>PC</sub> = 22.0 Hz), 26.6 (1 C, d, <sup>1</sup>J<sub>PC</sub> = 65.6 Hz), 22.3 (2 C), 21.4, 20.7, 13.8 (2 C).

ESI-MS, m/z (rel.int.) : 369 (100) [M-NTf<sub>2</sub>]

### Scheme 1

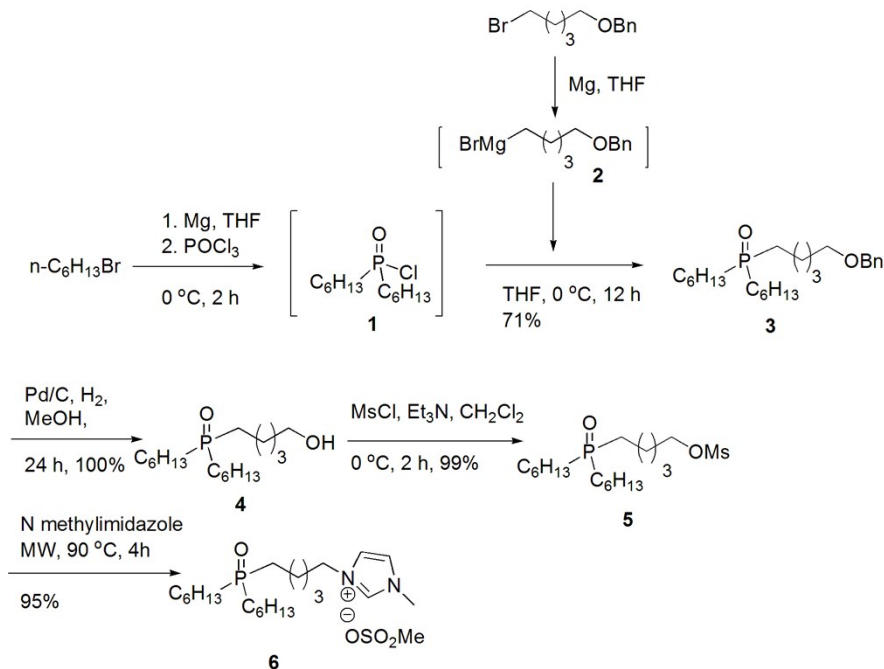

Then the desired TSIL- 7 was obtained by reacting IL 6 with lithium triflimide salt in dry acetone following scheme 2.

### Scheme 2

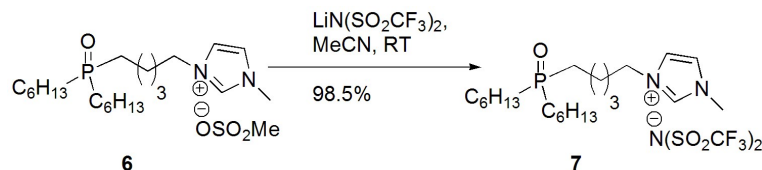

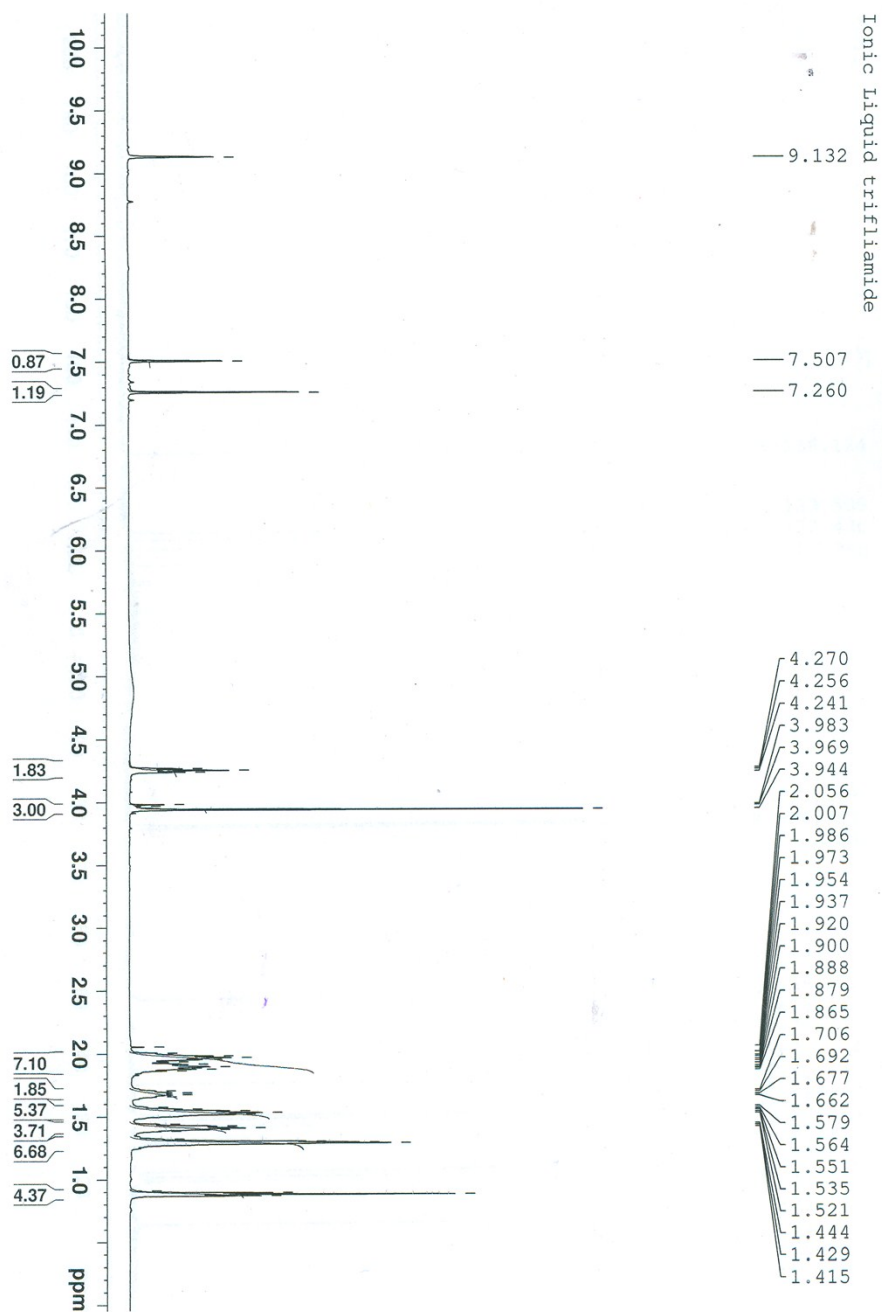

**Fig. S1.**  $^1\text{H}$  NMR spectra of PO-TSIL obtained in  $\text{CDCl}_3$

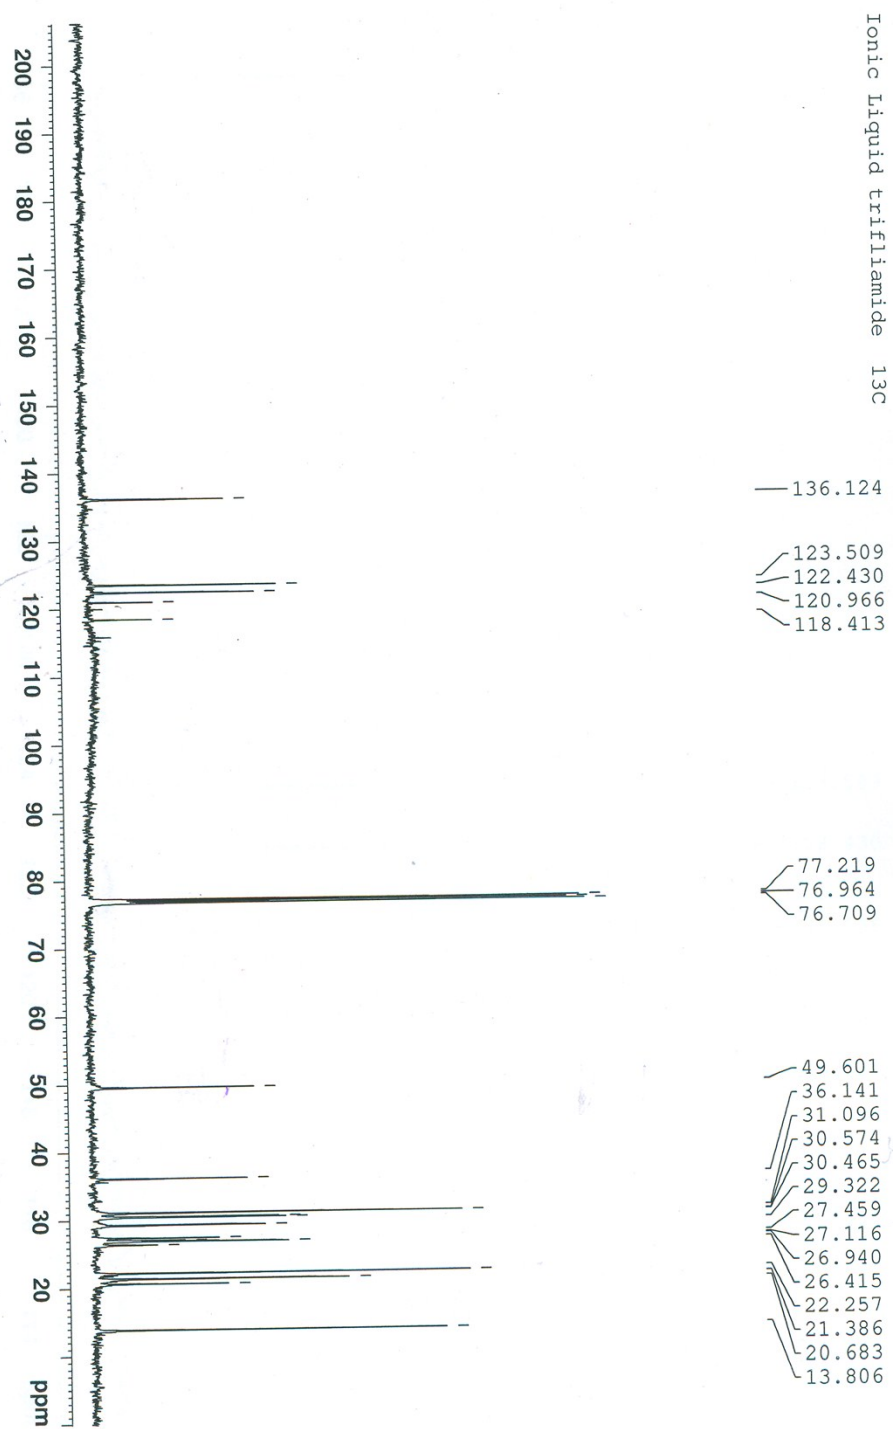

**Fig. S2.**  $^{13}\text{C}$  NMR spectra of PO-TSIL obtained in  $\text{CDCl}_3$

**Kinetics of extraction:**

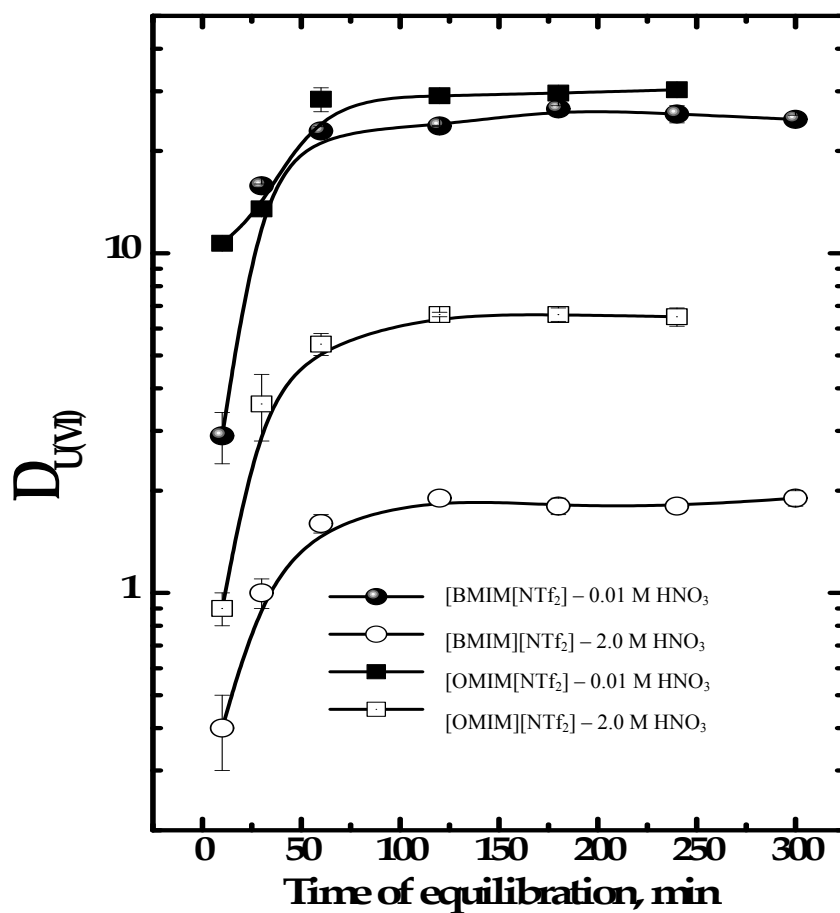

**Fig. S3.** Role of equilibration time on U(VI) extraction from 0.01 M and 2 M HNO<sub>3</sub> using both [BMIM]NTf<sub>2</sub> as well as [OMIM]NTf<sub>2</sub>

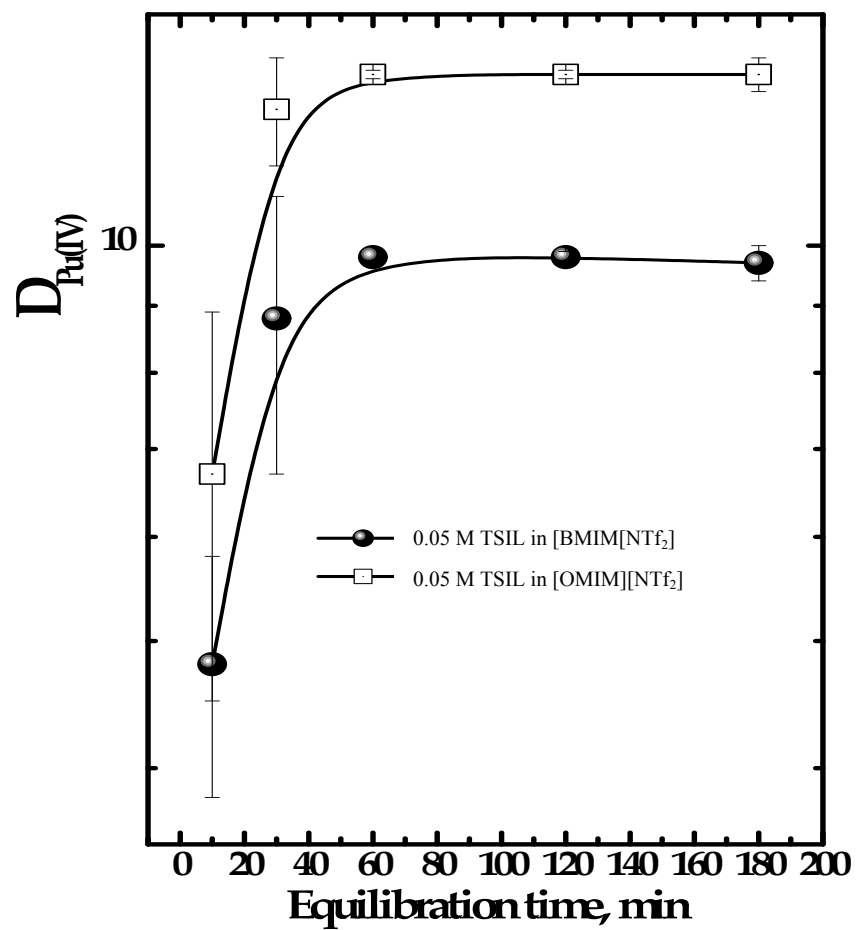

**Fig. S4.** Role of equilibration time on U(VI) extraction from 2 M  $\text{HNO}_3$  using both [BMIM]NTf<sub>2</sub> as well as [OMIM]NTf<sub>2</sub>

Nature of the extracted species by slope analysis method

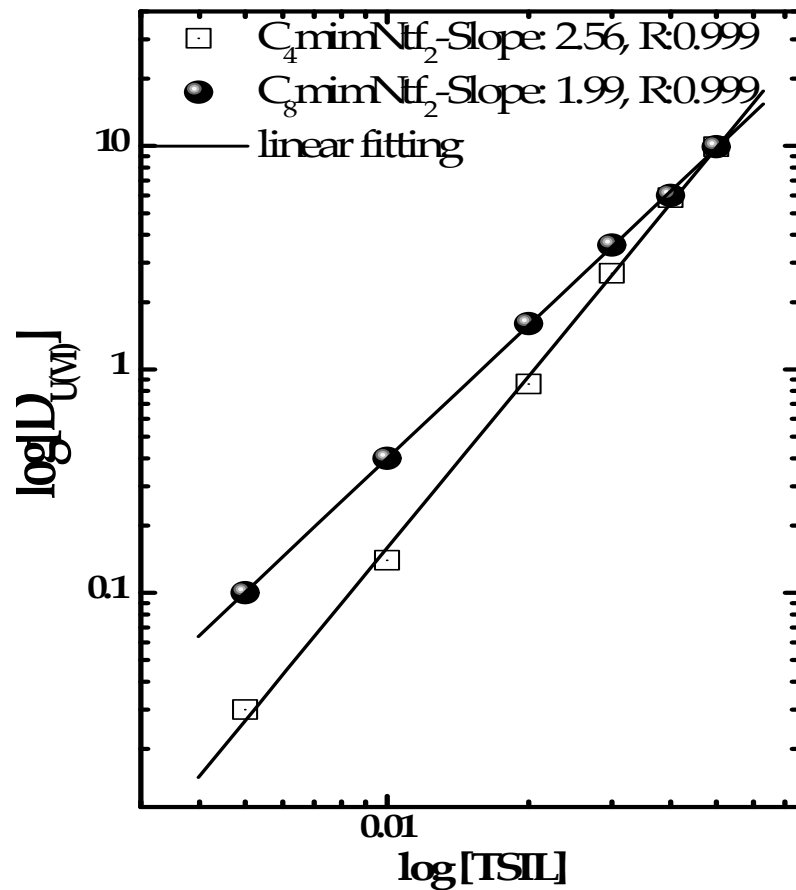

**Fig. S5.** Plots of  $\log D_U$  vs  $\log [\text{Ligand}]$  to ascertain the extracted species. Aqueous phase: 2 M  $\text{HNO}_3$  using both  $[\text{BMIM}]\text{NTf}_2$  as well as  $[\text{OMIM}]\text{NTf}_2$

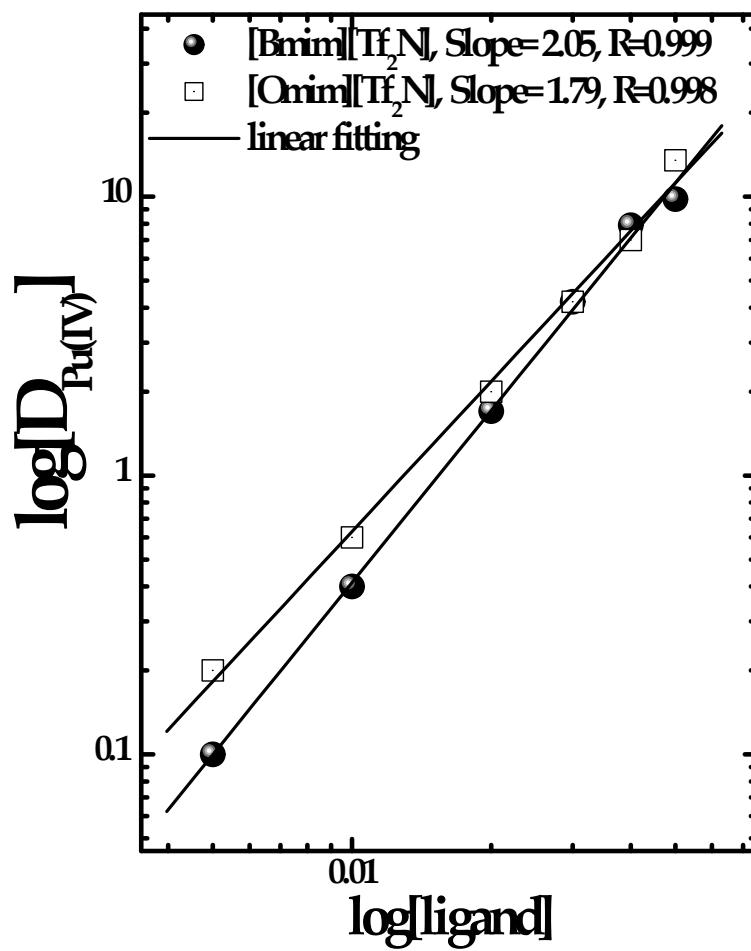

**Fig. S6.** Plots of  $\log D_{\text{Pu}}$  vs  $\log [\text{Ligand}]$  to ascertain the extracted species. Aqueous phase: 2 M  $\text{HNO}_3$  using both  $[\text{BMIM}]\text{NTf}_2$  as well as  $[\text{OMIM}]\text{NTf}_2$

## Stripping studies

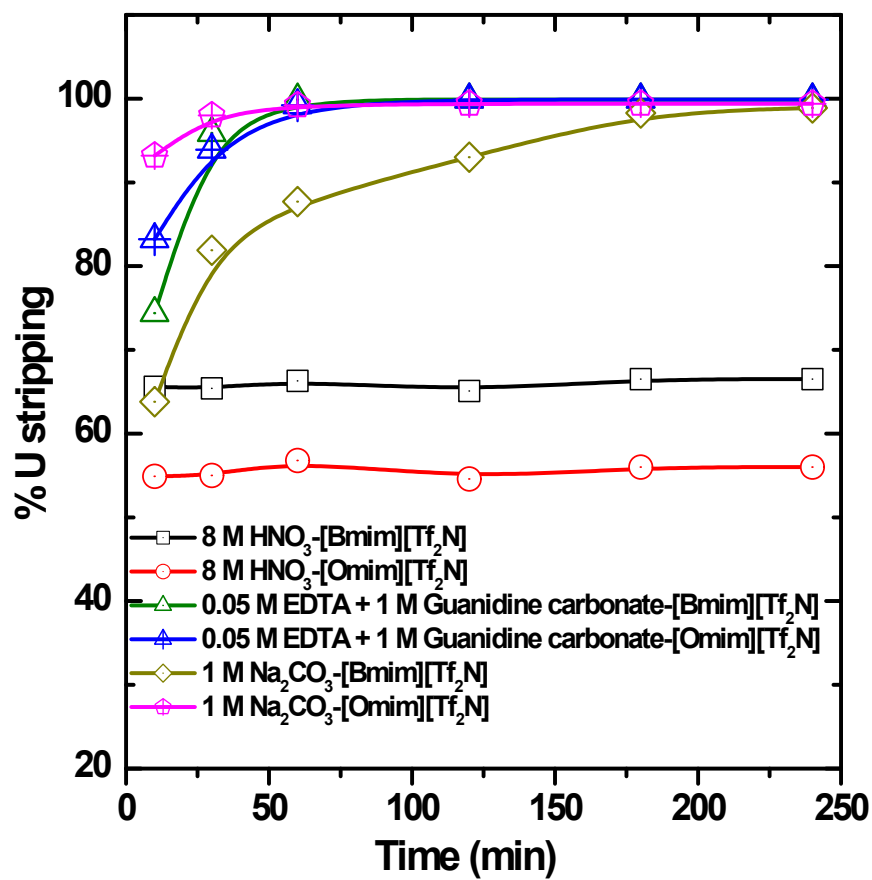

**Fig. S7.** Role of equilibration time on U(VI) stripping from under varying conditions.

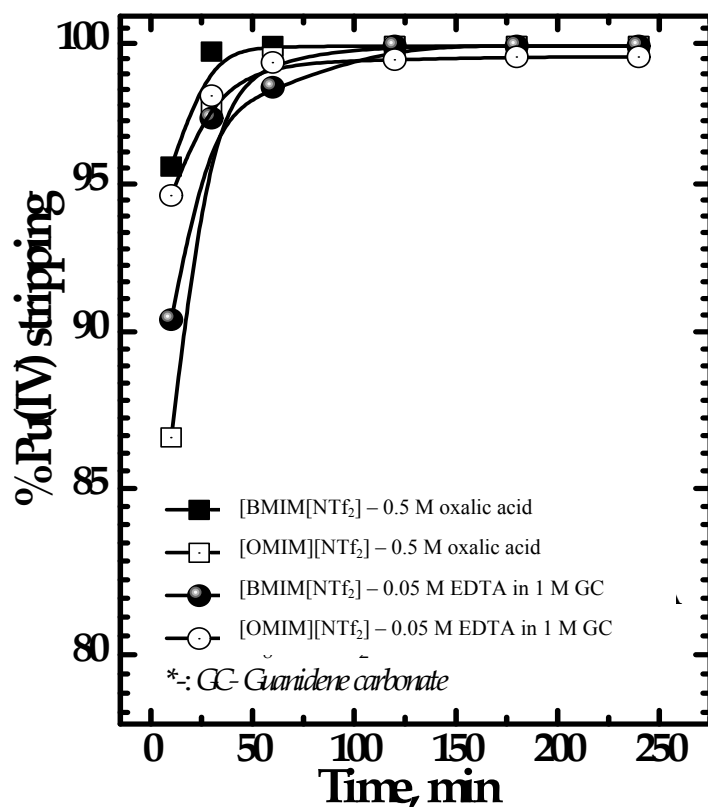

**Fig. S8.** Role of equilibration time on Pu(IV) stripping from both [BMIM]NTf<sub>2</sub> as well as [OMIM]NTf<sub>2</sub> using different strippants.

**Table S1.** Acid uptake by the ionic liquids when contacted with aqueous feeds containing different amounts of HNO<sub>3</sub>. Data obtained by aqueous phase titration.

| [HNO <sub>3</sub> ], M | Amount of acid extracted (M) |                        |
|------------------------|------------------------------|------------------------|
|                        | [BMIM]NTf <sub>2</sub>       | [OMIM]NTf <sub>2</sub> |
| 1                      | 0.065                        | 0.045                  |
| 2                      | 0.120                        | 0.080                  |
| 3                      | 0.186                        | 0.126                  |
| 4                      | 0.252                        | 0.172                  |
| 6                      | 0.408                        | 0.288                  |

## Radiolytic degradation studies

**Table S2.** Distribution data of the actinide ions as a function of the absorbed dose with [BMIM]NTf<sub>2</sub>. Values inside parentheses refer to those obtained with [OMIM]NTf<sub>2</sub>.

| Absorbed dose (kGy) | TSIL               |                    | TOPO               |                    |
|---------------------|--------------------|--------------------|--------------------|--------------------|
|                     | D <sub>U</sub>     | D <sub>Pu</sub>    | D <sub>U</sub>     | D <sub>Pu</sub>    |
| 0                   | 9.11 (9.9)         | 9.82 (13.5)        | 3.63 (23)          | 3.05 (136)         |
| 26                  | 4.01 (7.56)        | 0.38 (0.78)        | 1.85 (22.4)        | 1.98 (2.06)        |
| 53                  | 3.16 (4.89)        | 0.31 (0.30)        | 1.11 (16.2)        | 1.87 (1.82)        |
| % Decrease          | <b>60.3 (50.6)</b> | <b>96.8 (97.8)</b> | <b>69.4 (29.6)</b> | <b>38.7 (98.7)</b> |

## Fluorescence studies

### Instrumentation

Emission and excitation spectra were recorded on an Edinburgh F-900 Fluorescence Spectrometer in the 200–750 nm regions with a Xe lamp as an excitation source, M-300 monochromators and a Peltier cooled photomultiplier tube as detector. The acquisition and analysis of the data were carried out by F-900 software procured from Edinburgh Analytical Instruments, UK.

### Results

Photoluminescence investigation was carried out to probe local environment around uranyl ion in aqueous HNO<sub>3</sub> (1 M HNO<sub>3</sub>) medium and the extracts generated after complexation of UO<sub>2</sub><sup>2+</sup> ion with TOPO functionalized task specific ionic liquid in [BMIM]NTf<sub>2</sub> and [OMIM]NTf<sub>2</sub>; and TOPO in [BMIM]NTf<sub>2</sub>. The preliminary look on the emission spectra of these systems (**Fig. 5 of main text**) revealed that the nature of the species were entirely different in all the cases. Surprisingly, the emission profiles for UO<sub>2</sub><sup>2+</sup>- TOPO-TSIL complexes in [BMIM]NTf<sub>2</sub> and [OMIM]NTf<sub>2</sub> were also found to differ significantly. The emission maxima for UO<sub>2</sub><sup>2+</sup> in aqueous nitric acid medium was found to be at 507.540 nm, which was found to be shifted to the higher wavelength region on complexation ( $\lambda_{\text{max}}$  (TOPO) = 511.852 nm,  $\lambda_{\text{max}}$  (TOPO-TSIL in [OMIM]NTf<sub>2</sub>) = 516.907 nm,  $\lambda_{\text{max}}$  (TOPO-TSIL in [BMIM]NTf<sub>2</sub>)). The relative intensities of the vibronic structures of the emission spectra were also found to differ with each other. The symmetric stretching frequency of uranyl oxygen obtained from the emission spectra

revealed that in  $\text{UO}_2^{2+}$  TSIL complex, the U-O bonds were found to be shorter compared to U-TOPO complex. The decay profiles (**fig. S9 below**) revealed the presence of single species in case of U-TOPO extracts in  $[\text{BMIM}]\text{NTf}_2$  (93  $\mu\text{s}$ ) and U-TSIL extract in  $[\text{OMIM}]\text{NTf}_2$  (106  $\mu\text{s}$ ) whereas for U-TSIL extract in  $[\text{BMIM}]\text{NTf}_2$  showed the bi-exponential nature of the decay profile revealing the presence of two species ( $\tau_1 = 59 \mu\text{s}$  and  $\tau_2 = 302 \mu\text{s}$ ). This fact can also be supported by the slope values of the  $\log D$  vs  $\log[\text{Ligand}]$  plots.

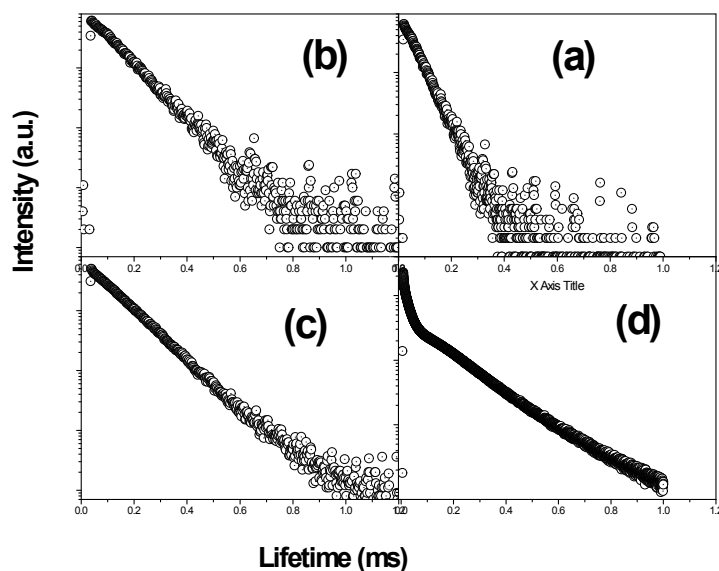

**Fig. S9:** Decay profiles for Luminescence spectra of (a) aq. uranyl, (b) U-TOPO extracts in  $[\text{BMIM}]\text{NTf}_2$  (c) U-TSIL extracts in  $[\text{OMIM}]\text{NTf}_2$  and (d) U-TSIL extracts in  $[\text{BMIM}]\text{NTf}_2$

## ESI-MS studies:

Extracted species:  $\text{UO}_2(\text{TSIL})_2(\text{NO}_3)_2^{2+}$ ; Calculated mass: ca. 566

### Acquisition Parameter

|             |          |                      |          |                  |           |
|-------------|----------|----------------------|----------|------------------|-----------|
| Source Type | ESI      | Ion Polarity         | Positive | Set Nebulizer    | 0.3 Bar   |
| Focus       | Active   | Set Capillary        | 3800 V   | Set Dry Heater   | 180 °C    |
| Scan Begin  | 50 m/z   | Set End Plate Offset | -500 V   | Set Dry Gas      | 4.0 l/min |
| Scan End    | 2000 m/z | Set Charging Voltage | 2000 V   | Set Divert Valve | Source    |
|             |          | Set Corona           | 0 nA     | Set APCI Heater  | 0 °C      |

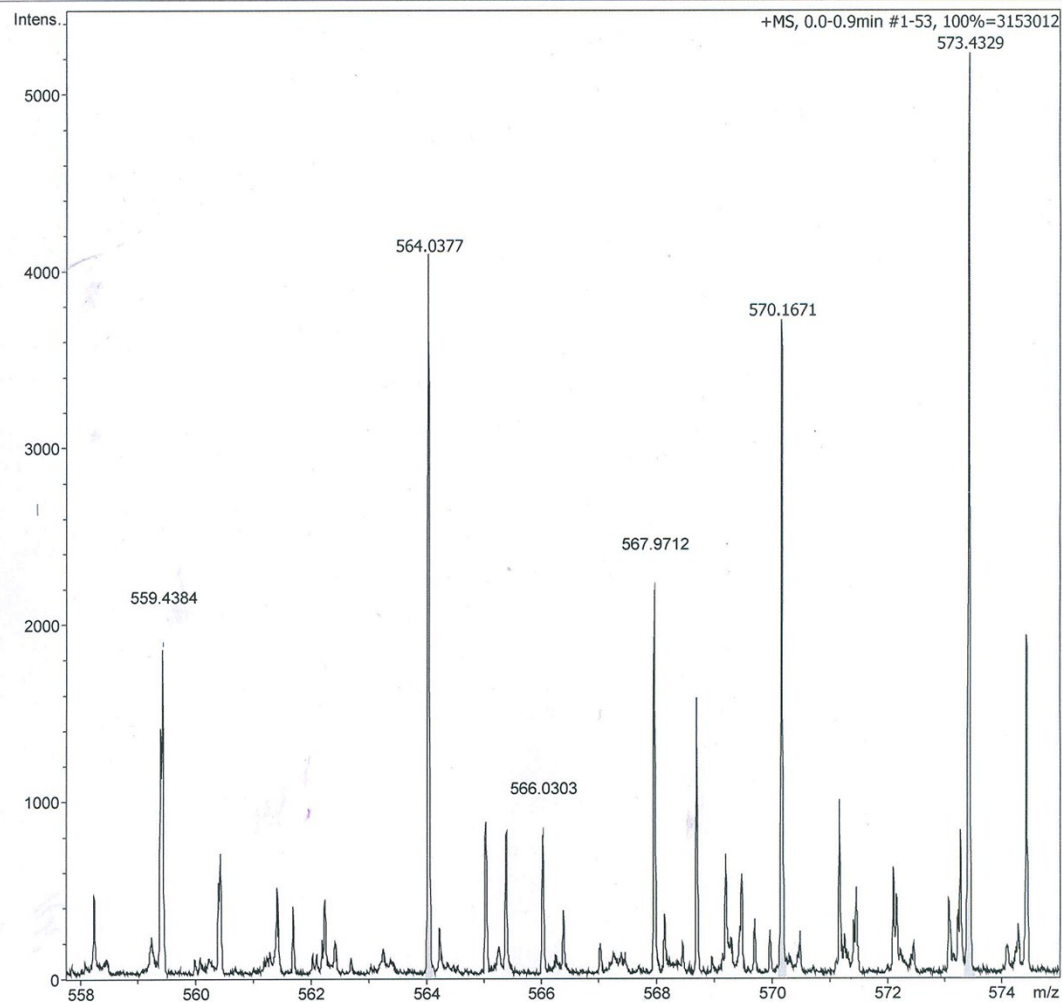

EXT-BARC-MINASHI-1.d

Bruker Compass DataAnalysis 4.1

printed: 1/4/2016 12:25:40 PM

by: GKL-OUT

Page 1 of 1

Extracted species:  $\text{UO}_2(\text{PO-TSIL})_3(\text{NO}_3)_3^{2+}$ ; Calculated mass: ca. 782

**Acquisition Parameter**

|             |          |                      |          |                  |           |
|-------------|----------|----------------------|----------|------------------|-----------|
| Source Type | ESI      | Ion Polarity         | Positive | Set Nebulizer    | 0.3 Bar   |
| Focus       | Active   | Set Capillary        | 3800 V   | Set Dry Heater   | 180 °C    |
| Scan Begin  | 50 m/z   | Set End Plate Offset | -500 V   | Set Dry Gas      | 4.0 l/min |
| Scan End    | 2000 m/z | Set Charging Voltage | 2000 V   | Set Divert Valve | Source    |
|             |          | Set Corona           | 0 nA     | Set APCI Heater  | 0 °C      |

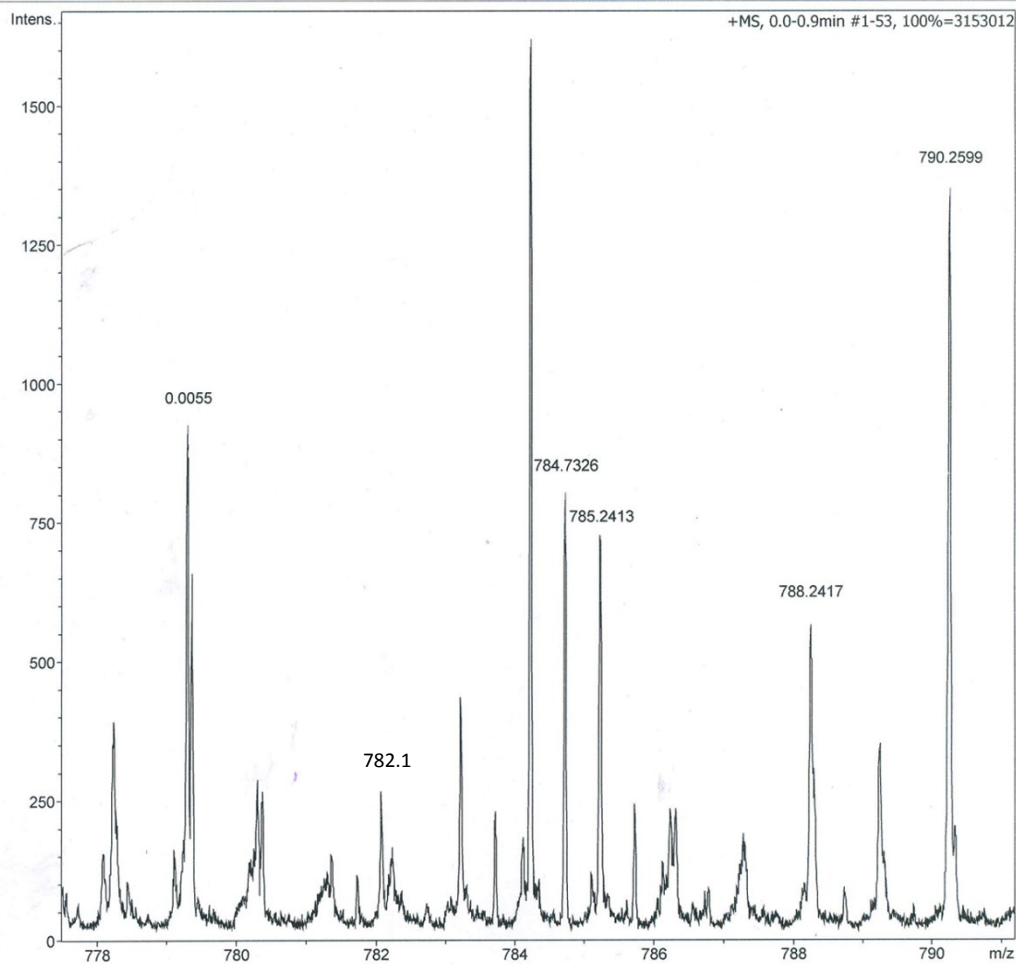

EXT-BARC-MINASHI-1.d

Bruker Compass DataAnalysis 4.1

printed: 1/4/2016 12:27:06 PM

by: GKL-OUT

Page 1 of 1

### Measurements of viscosity and water content in TSIL

Table S3: Viscosity and water content data (by Karl Fischer titration) obtained using 0.05 M TSIL (in either [C<sub>4</sub>mim][Tf<sub>2</sub>N] or [C<sub>8</sub>mim][Tf<sub>2</sub>N] as indicated below). Aq. phase for equilibration: 0.005 M uranyl nitrate solution in 1 M HNO<sub>3</sub>; Equilibration time: 1 h; Temperature: 25°C

| Diluent                                 | Viscosity, mPa·s     |                     | Water content, mg/mL |                     |
|-----------------------------------------|----------------------|---------------------|----------------------|---------------------|
|                                         | Before equilibration | After equilibration | Before equilibration | After equilibration |
| [C <sub>4</sub> mim][Tf <sub>2</sub> N] | 46.13 ± 0.09         | 33.37 ± 0.04        | 6.62 ± 0.11          | 19.74 ± 0.18        |
| [C <sub>8</sub> mim][Tf <sub>2</sub> N] | 81.41 ± 0.43         | 65.82 ± 0.04        | 5.50 ± 0.05          | 12.34 ± 0.08        |

The dynamic viscosity and density values of different solvents used in present studies were measured using an Anton Paar, Austria viscometer (model number SVN 3000).
